# Supplementary material for: Identification and validation of a Golgi apparatus related gene signature for prognosis prediction and immune microenvironment profiling in colorectal cancer
Source: Research Square preprint supplement (doi:10.21203/rs.3.rs-7659108/v1), 2025-11-16
Supplement: Supplementary file 1 [file b542e6192688f7145bf724c8.docx]

**Supplementary Material**


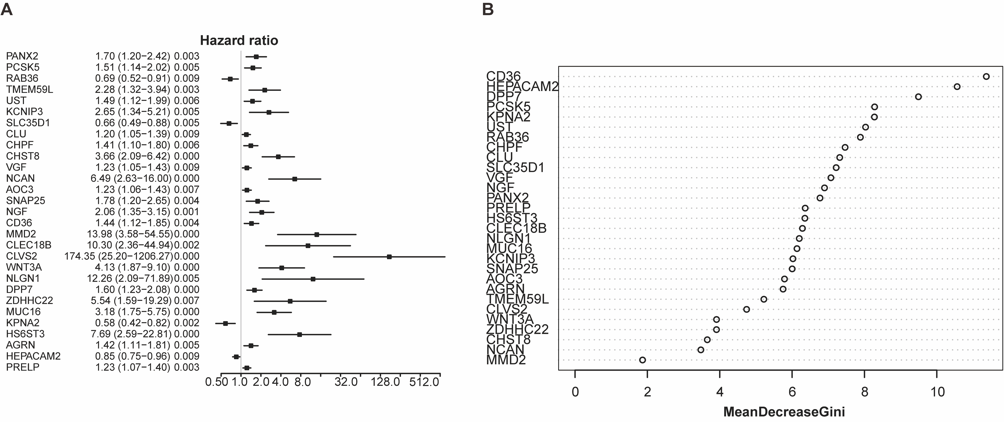


**Fig. S1** Association of GA-related genes with overall survival. **A** Forest plot of hazard ratios for candidate genes in univariate Cox regression. **B** Random forest variable importance ranking


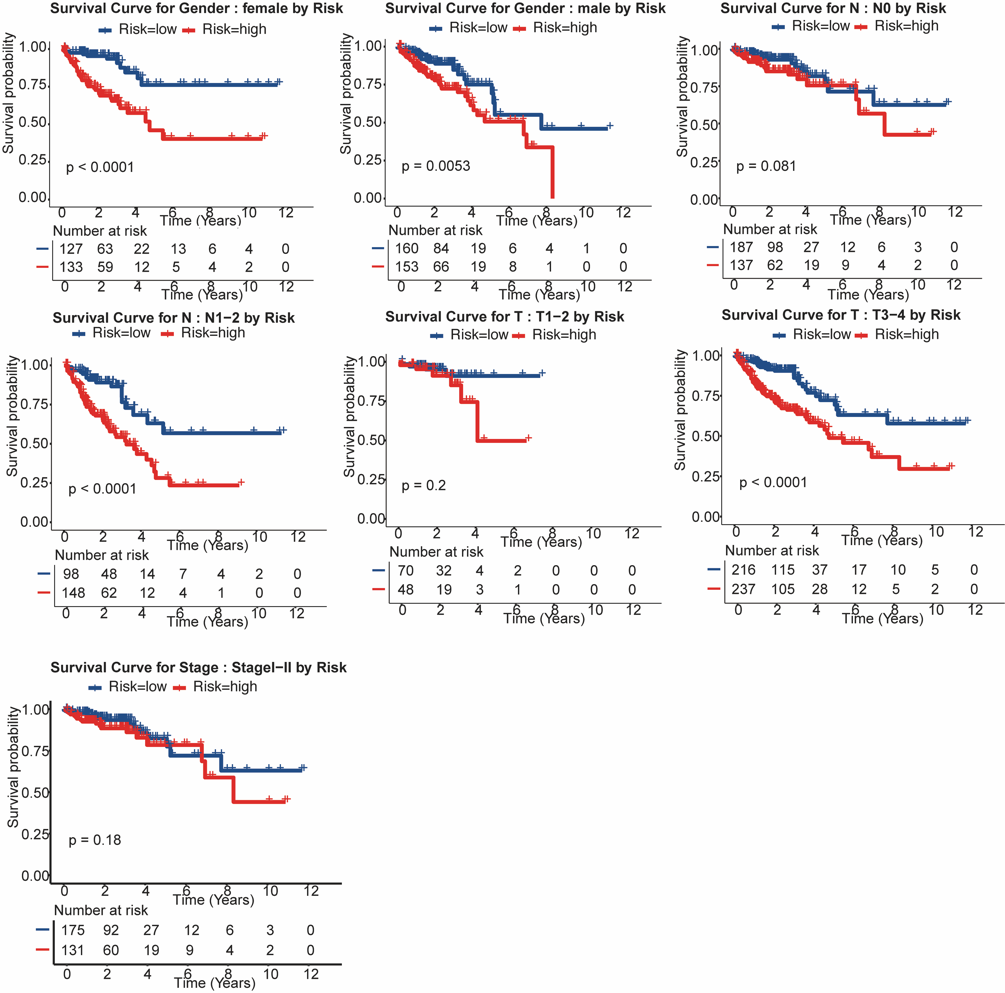


**Fig. S2** Prognostic value of the GA signature across clinical subgroups. Kaplan–Meier survival curves for high- vs. low-risk groups stratified by gender, stage (I–II), T stage (T1–2 vs. T3–4), N stage (N0 vs. N1–2), and M stage (M0 vs. M1)
